# Supplementary material for: Chemical Composition and Related Properties of Lime (Tilia cordata Mill.) Bark and Wood as Affected by Tree Growth Conditions
Source: MDPI journal article supplement (doi:10.3390/ma15114033), 2022-06-06
Supplement: s1 [file s1]

**Table S1.** Two-way ANOVA tables for the chemical composition of lime (*Tilia cordata* Mill.) bark and wood depending on tissue and environment.

| Chemical composition       | Effect          | SS     | df | MS      | F value | p-value |
|----------------------------|-----------------|--------|----|---------|---------|---------|
| Holocellulose              | Tissue (a)      | 4237.1 | 1  | 4237.1  | 613.67  | 0.0000  |
|                            | Environment (b) | 1.4273 | 2  | 0.71363 | 0.10336 | 0.9021  |
|                            | a x b           | 81.796 | 2  | 40.898  | 5.9235  | 0.0058  |
| Cellulose                  | Tissue (a)      | 1163   | 1  | 1163.2  | 652.22  | 0.0000  |
|                            | Environment (b) | 11.156 | 2  | 5.58    | 3.1277  | 0.0553  |
|                            | a x b           | 55.624 | 2  | 27.81   | 15.594  | 0.0000  |
| Pentosans                  | Tissue (a)      | 726.37 | 1  | 726.37  | 564.13  | 0.0000  |
|                            | Environment (b) | 3.6972 | 2  | 1.849   | 1.4357  | 0.2512  |
|                            | a x b           | 2.0090 | 2  | 1.004   | 0.78013 | 0.4659  |
| Lignin                     | Tissue (a)      | 4504.5 | 1  | 4504.5  | 4095.3  | 0.0000  |
|                            | Environment (b) | 156.85 | 2  | 78.427  | 71.304  | 0.0000  |
|                            | a x b           | 68.375 | 2  | 34.187  | 31.082  | 0.0000  |
| Substances soluble in NaOH | Tissue (a)      | 3082.4 | 1  | 3082.4  | 416.14  | 0.0000  |
|                            | Environment (b) | 14.376 | 2  | 7.1881  | 0.97044 | 0.3892  |
|                            | a x b           | 168.12 | 2  | 84.061  | 11.349  | 0.0002  |
| Substances soluble in EtOH | Tissue (a)      | 240.39 | 1  | 240.39  | 58.599  | 0.0000  |
|                            | Environment (b) | 68.245 | 2  | 34.122  | 8.3180  | 0.0010  |
|                            | a x b           | 11.611 | 2  | 5.8054  | 1.4152  | 0.2557  |

SS – a sum of squares, df – degrees of freedom, MS – mean squares, F – Fisher's F – test

**Table S2.** Two-way ANOVA tables for the chemical composition of elements (K, Ca, Na, Mg) in lime (*Tilia cordata* Mill.) depending on tissue and environment.

| Chemical composition | Effect     | SS     | df | MS     | F value | p-value |
|----------------------|------------|--------|----|--------|---------|---------|
| K                    | Tissue (a) | 486267 | 1  | 486267 | 3020.7  | 0.0000  |

|    |                 |         |   |         |        |        |
|----|-----------------|---------|---|---------|--------|--------|
|    | Environment (b) | 601972  | 2 | 300986  | 1869.7 | 0.0000 |
|    | a x b           | 1520713 | 2 | 760356  | 4723.3 | 0.0000 |
|    |                 |         |   |         |        |        |
| Ca | Tissue (a)      | 5855263 | 1 | 5855263 | 294.68 | 0.0000 |
|    | Environment (b) | 8934733 | 2 | 4467367 | 224.83 | 0.0000 |
|    | a x b           | 1744419 | 2 | 872209  | 43.896 | 0.0000 |
| Na | Tissue (a)      | 5590.2  | 1 | 5590.2  | 67.438 | 0.0000 |
|    | Environment (b) | 451614  | 2 | 225807  | 2724.0 | 0.0000 |
|    | a x b           | 1555546 | 2 | 777773  | 9382.7 | 0.0000 |
| Mg | Tissue (a)      | 16011   | 1 | 16011   | 202.38 | 0.0000 |
|    | Environment (b) | 13416   | 2 | 6707.9  | 84.792 | 0.0000 |
|    | a x b           | 243681  | 2 | 121841  | 1540.1 | 0.0000 |

SS – a sum of squares, df – degrees of freedom, MS – mean squares, F – Fisher's F-test.

Contents of potassium, sodium, magnesium and calcium (Table 2) in bark and wood changed markedly and differences between the results were statistically significant.

**Table S3.** Two-way ANOVA tables for the chemical composition of elements (Fe, Zn, Cu, Pb, Cd, B, Ni, Cr, Al, As, Hg) of lime (*Tilia cordata* Mill.) wood depending on tissue and environment.

| Chemical composition | Effect          | SS     | df | MS     | F value | p-value |
|----------------------|-----------------|--------|----|--------|---------|---------|
| Fe                   | Tissue (a)      | 46393  | 1  | 46393  | 10915   | 0.0000  |
|                      | Environment (b) | 8730.2 | 2  | 4365.1 | 1027.0  | 0.0000  |
|                      | a x b           | 46489  | 2  | 23245  | 5468.9  | 0.0000  |
| Zn                   | Tissue (a)      | 658.65 | 1  | 658.65 | 13953   | 0.0000  |
|                      | Environment (b) | 105.32 | 2  | 52.662 | 1115.6  | 0.0000  |
|                      | a x b           | 122.62 | 2  | 61.311 | 1298.9  | 0.0000  |
| Cu                   | Tissue (a)      | 145.29 | 1  | 145.29 | 5085.9  | 0.0000  |
|                      | Environment (b) | 70.277 | 2  | 35.139 | 1230.0  | 0.0000  |
|                      | a x b           | 100.43 | 2  | 50.214 | 1757.7  | 0.0000  |
| Pb                   | Tissue (a)      | 913.57 | 1  | 913.57 | 15915   | 0.0000  |

|    |                 |         |   |         |        |        |
|----|-----------------|---------|---|---------|--------|--------|
|    | Environment (b) | 289.38  | 2 | 144.69  | 2520.5 | 0.0000 |
|    | a x b           | 331.08  | 2 | 165.54  | 2883.8 | 0.0000 |
| Cd | Tissue (a)      | 0.09838 | 1 | 0.09838 | 96.296 | 0.0000 |
|    | Environment (b) | 1.0965  | 2 | 0.54826 | 536.65 | 0.0000 |
|    | a x b           | 0.00231 | 2 | 0.00115 | 1.1288 | 0.3555 |
| B  | Tissue (a)      | 69.862  | 1 | 69.862  | 750.47 | 0.0000 |
|    | Environment (b) | 805.62  | 2 | 402.81  | 4327.1 | 0.0000 |
|    | a x b           | 28.597  | 2 | 14.298  | 153.60 | 0.0000 |
| Ni | Tissue (a)      | 30.544  | 1 | 30.544  | 1094.9 | 0.0000 |
|    | Environment (b) | 66.639  | 2 | 33.319  | 1194.4 | 0.0000 |
|    | a x b           | 17.322  | 2 | 8.6608  | 310.45 | 0.0000 |
| Cr | Tissue (a)      | 12.198  | 1 | 12.198  | 386.88 | 0.0000 |
|    | Environment (b) | 66.769  | 2 | 33.384  | 1058.8 | 0.0000 |
|    | a x b           | 2.6887  | 2 | 1.3443  | 42.638 | 0.0000 |
| Al | Tissue (a)      | 3554.9  | 1 | 3555    | 53.287 | 0.0000 |
|    | Environment (b) | 45746   | 2 | 22873   | 342.85 | 0.0000 |
|    | a x b           | 18625   | 2 | 9312    | 139.59 | 0.0000 |
| As | Tissue (a)      | 0.00091 | 1 | 0.00091 | 17590  | 0.0000 |
|    | Environment (b) | 0.00011 | 2 | 0.00006 | 1111.8 | 0.0000 |
|    | a x b           | 0.00018 | 2 | 0.00009 | 1732.1 | 0.0000 |
| Hg | Tissue (a)      | 0.00233 | 1 | 0.00233 | 48.328 | 0.0000 |
|    | Environment (b) | 0.00091 | 2 | 0.00046 | 9.4590 | 0.0034 |
|    | a x b           | 0.00110 | 2 | 0.00055 | 11.419 | 0.0017 |

SS – a sum of squares, df – degrees of freedom, MS – mean squares, F – Fisher's F-test.

Contents of selected heavy metals (Tables 3 a, b) determined in bark and wood changed greatly. Differences in the obtained results were statistically significant.
